# Supplementary material for: Molecular Classification of Breast Cancer Utilizing Long Non-Coding RNA (lncRNA) Transcriptomes Identifies Novel Diagnostic lncRNA Panel for Triple-Negative Breast Cancer
Source: MDPI journal article supplement (doi:10.3390/cancers13215350), 2021-10-26
Supplement: s1 [file s1]

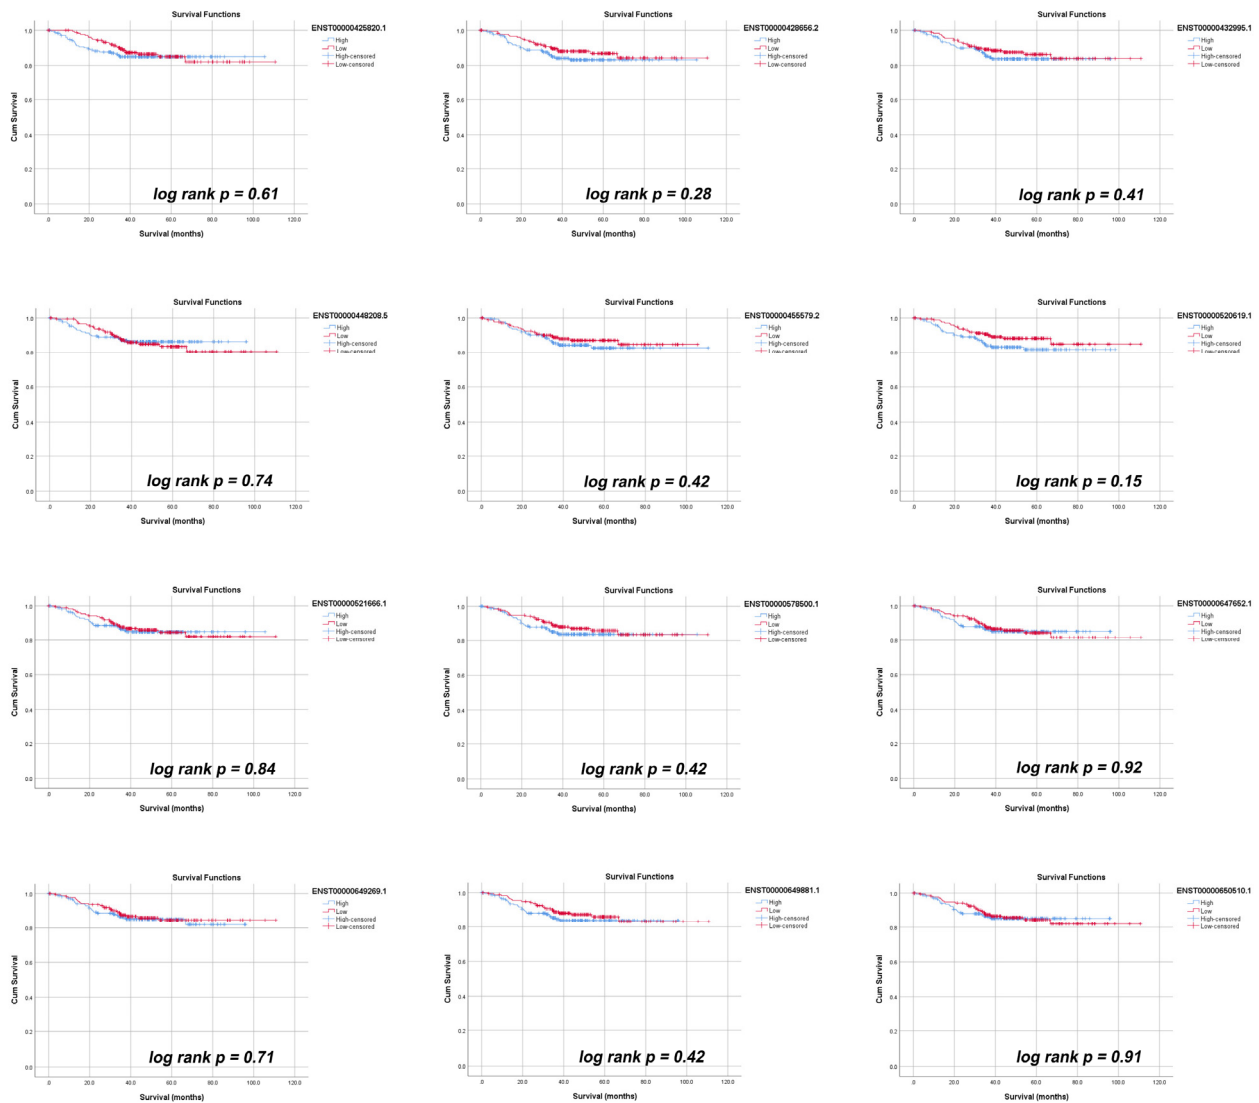

**Supplementary figure S1. Survival analysis of thirteen identified lncRNA transcripts in a cohort of 360 TNBC (PRJNA486023).** The cohort was divided into High and Low based on median lncRNA expression and were subjected to Kaplan–Meier survival analysis in SPSS (v26). Log-rank tests p values are indicated on each plot.
